# Supplementary material
Source: Springer Nature journal article supplement (https://www.springermedizin.de/resource/supplementary/12936_2012_2877_MOESM4_ESM.pdf/9544224)
Supplement: MOESM4 [file 9544224]

| Factors                                           | No of nets | Proportion within nets in good condition | Odds Ratio | 95% CI    | p-value |
|---------------------------------------------------|------------|------------------------------------------|------------|-----------|---------|
| <b>Gender of head of household</b>                |            |                                          |            |           |         |
| Male                                              | 106        | 13.2                                     | Ref        |           |         |
| Female                                            | 90         | 17.8                                     | 1.4        | 0.65-3.1  | 0.38    |
| <b>Education of head of household</b>             |            |                                          |            |           |         |
| None                                              | 103        | 14.2                                     | Ref        |           |         |
| Primary school                                    | 37         | 24.3                                     | 1.95       | 0.8-4.9   |         |
| Lower secondary school                            | 33         | 15.2                                     | 1.1        | 0.4-3.2   |         |
| Upper secondary school                            | 15         | 6.7                                      | 0.4        |           | 0.36    |
| <b>Occupation</b>                                 |            |                                          |            |           |         |
| Farmer                                            | 154        | 13                                       | Ref        |           |         |
| Other                                             | 32         | 31.3                                     | 3.05       | 1.3-7.4   | 0.017   |
| Salaried                                          | 8          | 0                                        |            |           |         |
| <b>Number of nets owned by household</b>          |            |                                          |            |           |         |
| 1 to 2                                            | 118        | 16.1                                     | Ref        |           |         |
| 3 to 4                                            | 73         | 13.7                                     | 0.83       | 0.36-1.89 | 0.9     |
| 5 or more                                         | 13         | 15.38                                    | 0.95       | 0.19-4.62 |         |
| <b>Location of sleeping site</b>                  |            |                                          |            |           |         |
| Sleeping room                                     | 164        | 15.2                                     | Ref        |           |         |
| Living room                                       | 22         | 18.2                                     | 1.24       | 0.39-3.95 | 0.61    |
| Kitchen                                           | 14         | 7.1                                      | 0.43       | 0.05-3.42 |         |
| <b>Sleeping site has to be set up every night</b> |            |                                          |            |           |         |
| Yes                                               | 47         | 21.3                                     | Ref        |           |         |
| No                                                | 153        | 13.7                                     | 0.59       | 0.25-1.4  | 0.22    |
| <b>Bednet tucked under bed at night</b>           |            |                                          |            |           |         |
| No                                                | 85         | 10.6                                     | Ref        |           |         |
| Yes                                               | 113        | 18.6                                     | 1.9        | 0.83-4.45 | 0.11    |
| <b>Number of sleepers under the net</b>           |            |                                          |            |           |         |
| 1                                                 | 139        | 16.6                                     | Ref        |           |         |
| 2                                                 | 43         | 9.3                                      | 0.52       | 0.17-1.6  | 0.22    |
| 3                                                 | 11         | 0                                        |            |           |         |
| 4                                                 | 4          | 0                                        |            |           |         |
| <b>Frequency of washing</b>                       |            |                                          |            |           |         |
| Every month                                       | 8          | 37.5                                     | Ref        |           | 0.09    |
| Every 2-3 months                                  | 10         | 0                                        |            |           |         |
| 3 times per year                                  | 41         | 14.6                                     | 0.29       | 0.05-1.5  |         |
| Twice a year                                      | 55         | 18.2                                     | 0.37       | 0.08-1.8  |         |
| Every year                                        | 42         | 4.8                                      | 0.08       | 0.01-0.62 |         |
| Less than once per year                           | 24         | 20.8                                     | 0.43       | 0.08-2.5  |         |
| <b>Rubbed against rocks when washing</b>          |            |                                          |            |           |         |
| No                                                | 166        | 15.1                                     | Ref        |           |         |
| Yes                                               | 10         | 10                                       | 0.63       | 0.07-5.2  | 0.65    |
| <b>Nets dried under the sun</b>                   |            |                                          |            |           |         |
| No                                                | 65         | 18.5                                     | Ref        |           | 0.27    |
| Yes                                               | 120        | 12.5                                     | 0.63       | 0.3-1.4   |         |
| <b>Cleanliness of the net</b>                     |            |                                          |            |           |         |
| Clean                                             | 24         | 33.3                                     | Ref        |           | 0.04    |
| Slightly dirty                                    | 115        | 13.9                                     | 0.32       | 0.12-0.88 |         |
| Very dirty                                        | 60         | 10                                       | 0.22       | 0.07-0.74 |         |
